# Supplementary material for: Water-Soluble Dicationic Deuteroporphyrin Derivative for Antimicrobial PDT: Singlet Oxygen Generation, Passive Carrier Interaction and Nosocomial Bacterial Strains Photoinactivation
Source: MDPI journal article supplement (doi:10.3390/photochem3010011), 2023-03-11
Supplement: s1 [file s1]

Archive with 1 entries (1 files):
- photochem-2263366-supplementary.pdf
